# Supplementary material for: Disparities and Trends in Liver Cancer Incidence and Mortality Across the United States
Source: Research Square preprint supplement (doi:10.21203/rs.3.rs-6423687/v1), 2025-05-07
Supplement: Supplementary file 1 [file 2d7450f9bc1279e89bf9c806.docx]

Supplemental Table 1. Annual Percent Change in Age-Adjusted Incidence Rates of Liver Cancer by Race/Ethnicity and Stage at Diagnosis stratified by Race/Ethnicity.

|  |  |  |  |  |  |  |
| --- | --- | --- | --- | --- | --- | --- |
|  | **Incidence** |  |  |  |  |  |
| Variables | Overall | Non-Hispanic White | Non-Hispanic Black | Non-Hispanic AI/AN | Non-Hispanic Asian/PI | Hispanic |
|  | APC (95% CI) | APC (95% CI) | APC (95% CI) | APC (95% CI) | APC (95% CI) | APC (95% CI) |
| **Sex**  Male  2004-2008  2008-2014  2014-2019  2019-2021  Female  2004-2008  2008-2014  2014-2019  2019-2021 | 6.22 (1.15, 13.4)*  2.24 (-2.31, 6.91)  -1.40 (-7.65, 4.56)  -4.18 (-10.2, 0.59)  3.85 (-2.76, 13.6)  1.26 (-3.95, 8.42)  -2.59 (-7.06, 5.31)  -1.40 (-8.89, 5.15) | 9.29 (6.68, 11.4)***  3.00 (0.55, 6.24)*  -1.26 (-4.81, 1.27)  -3.70 (-6.13, -2.02)**  8.52 (4.15, 19.1)*  1.29 (-2.17, 5.78)  -4.06 (-7.28, 3.92)  3.17 (-2.29, 10.7) | 8.05 (0.89, 21.7)*  0.18 (-5.68, 3.90)  -9.97 (-14.2, 6.04)  -0.89 (-9.96, 7.76)  -1.18 (-18.8, 23.3)  2.74 (-9.47, 17.1)  -5.45 (-12.9, 15.4)  -13.6 (-30.7, 0.35) | -22.9 (-44.8, 14.2)  20.5 (-14.2, 51.9)  -0.27 (-18.6, 19.2)  -5.96 (-32.0, 18.5)  -9.43 (-47.1, 47.3)  10.0 (-20.4, 51.5)  2.32 (-24.9, 31.4)  -3.09 (-34.2, 34.6) | 2.67 (-5.08, 14.8)  -2.58 (-9.09, 3.98)  -6.88 (-12.6, 3.42)  -1.89 (-11.1, 7.82)  2.13 (-9.49, 20.3)  -1.07 (-13.3, 9.04)  -5.43 (-12.2, 4.59)  -4.45 (-18.7, 6.96) | 4.65 (-7.71, 22.2)  2.36 (-8.23, 11.6)  -2.49 (-10.1, 8.28)  -4.28 (-15.3, 5.36)  2.33 (-5.14, 11.8)  7.11 (-3.38, 10.9)  -3.37 (-6.88, 9.58)  -0.67 (-7.09, 5.73) |
| **Staging**  Localized  2004-2008  2008-2014  2014-2019  2019-2021  Regional  2004-2008  2008-2014  2014-2019  2019-2021  Distant  2004-2008  2008-2014  2014-2019  2019-2021 | 7.41 (3.52, 14.0)**  2.39 (-0.33, 7.50)  -5.42 (-7.89, 5.13)  -3.80 (-7.94, 0.61)  7.04 (3.29, 16.0)**  0.04 (-2.89, 1.48)  -5.63 (-10.3, 2.53)  3.17 (-4.83, 10.0)  -1.87 (-100.0, 5.7e11)  -1.40 (-99.9, 2.6e10)  2.15 (-0.97, 3.6e9)  -3.34 (-8.57, -0.24)* | 10.0 (5.94, 19.1)**  2.89 (-0.41, 8.91)  -5.26 (-7.89, 6.16)  -1.84 (-6.11, 3.59)  11.2 (7.44, 20.0)***  3.33 (0.82, 5.13)*  -4.86 (-7.77, 5.21)  -1.37 (-6.08, 2.81)  5.23 (-0.45, 12.9)  1.96 (-11.1, 7.52)  -8.08 (-10.6, 5.56)  0.51 (-6.53, 7.30) | 6.37 (-4.28, 18.6)  -0.77 (-6.21, 14.1)  3.81 (-14.7, 9.77)  -10.9 (-21.1, -2.74)*  3.05 (-14.9, 29.1)  -0.96 (-13.2, 16.9)  -4.47 (-15.8, 10.2)  1.24 (-18.8, 21.2)  15.9 (-8.09, 53.0)  -6.54 (-17.3, 10.2)  1.63 (-18.4, 18.3)  -6.98 (-31.1, 12.9) | 10.4 (-16.9, 60.4)  -4.95 (-19.5, 28.9)  12.8 (-18.3, 30.9)  -4.96 (-28.7, 18.2)  -16.2 (-42.7, 18.7)  4.13 (-17.6, 38.4)  10.6 (-27.6, 31.4)  -8.82 (-36.9, 27.3)  6.62 (-37.9, 66.9)  -26.9 (-44.9, 60.8)  21.9 (-34.4, 66.9)  -8.18 (-48.5, 29.0) | 6.73 (-0.02, 20.6)  -1.35 (-7.31, 3.56)  -7.52 (-12.5, 4.47)  -5.18 (-12.2, 3.22)  -6.49 (-15.9, 3.41)  -1.97 (-12.3, 6.34)  -7.46 (-12.9, 3.69)  -4.27 (-18.1, 7.87)  8.57 (-9.23, 33.0)  -4.40 (-17.0, 7.05)  -6.16 (-16.4, 7.40)  6.11 (-9.95, 21.6) | 2.74 (-5.16, 11.3)  6.89 (-2.02, 11.9)  -0.67 (-6.45, 4.19)  -5.54 (-13.7, -0.71)*  7.83 (-1.91, 19.6)  2.10 (-7.87, 8.69)  -4.60 (-10.4, 3.81)  1.38 (-6.80, 11.9)  0.92 (-17.8, 31.2)  -5.15 (-17.5, 16.1)  4.43 (-13.2, 16.1)  -2.22 (-17.6, 14.3) |
| **Race/Ethnicity**  Non-Hispanic White  2004-2008  2008-2014  2014-2019  2019-2021  Non-Hispanic Black  2004-2008  2008-2014  2014-2019  2019-2021  Non-Hispanic AI/AN  2004-2008  2008-2014  2014-2019  2019-2021  Non-Hispanic Asian/PI  2004-2008  2008-2014  2014-2019  2019-2021  Hispanic  2004-2008  2008-2014  2014-2019  2019-2021 | 8.23 (6.62, 12.3)***  2.41 (0.99, 6.19)**  -2.35 (-4.57, 2.84)  -3.21 (-6.25, -0.88)*  5.89 (-5.63, 24.9)  0.97 (-7.35, 10.4)  -9.41 (-15.4, 9.58)  -3.60 (-15.4, 7.86)  -17.7 (-33.5, 8.82)  16.6 (-7.29, 32.7)  0.57 (-11.2, 10.3)  -6.25 (-21.7, 7.04)  2.86 (-2.34, 12.2)  -2.94 (-7.90, 1.09)  -6.75 (-10.3, 1.57)  -3.49 (-10.1, 3.72)  4.58 (-2.74, 13.5)  2.93 (-4.97, 8.40)  -1.79 (-6.60, 6.06)  -3.43 (-9.32, 2.05) |  |  |  |  |  |
|  |  |  |  |  |  |  |

Log-normal Regression via Joinpoint. *p<0.05 **p<0.01 ***p<0.001

Supplemental Table 2. Annual Percent Change in Age-Adjusted Mortaltiy Rates of Liver Cancer by Race/Ethnicity and Stage at Diagnosis stratified by Race/Ethnicity.

|  |  |  |  |  |  |  |
| --- | --- | --- | --- | --- | --- | --- |
|  | **Mortality** |  |  |  |  |  |
| Variables | Overall | Non-Hispanic White | Non-Hispanic Black | Non-Hispanic AI/AN | Non-Hispanic Asian/PI | Hispanic |
|  | APC (95% CI) | APC (95% CI) | APC (95% CI) | APC (95% CI) | APC (95% CI) | APC (95% CI) |
| **Sex**  Male  2004-2008  2008-2014  2014-2019  2019-2021  Female  2004-2008  2008-2014  2014-2019  2019-2021 | 33.2 (19.5, 47.2)***  4.93 (1.82, 7.19)**  -2.06 (-5.21, 7.11)  0.61 (-4.26, 4.76)  31.9 (14.2, 49.6)***  3.58 (-1.27, 6.84)  -1.60 (-5.99, 7.35)  1.71 (-3.53, 8.11) | 42.5 (26.9, 55.5)***  4.47 (0.57, 8.00)*  8.02 (-5.06, 11.5)  -1.79 (-8.23, 2.49)  42.9 (22.2, 69.3)*  3.66 (-1.36, 6.32)  -2.85 (-7.54, 8.67)  2.03 (3.62, 10.3) | 38.2 (9.11, 77.5)**  2.96 (-9.27, 9.57)  -5.74 (-12.6, 11.8)  0.16 (-13.7, 14.8)  26.8 (-10.9, 101.9)  5.08 (-15.0, 26.3)  -0.09 (-17.5, 20.3)  -4.40 (-25.6, 17.9) | 14.1 (-14.2, 59.2)  3.32 (-9.51, 34.8)  -2.17 (-13.3, 15.4)  10.9 (-6.15, 31.2)  18.8 (-32.0, 133.5)  -8.54 (-30.7, 39.6)  8.34 (-14.5, 57.8)  -20.2 (-52.9, 4.24) | 32.9 (19.1, 51.9)***  1.26 (-3.64, 4.22)  -4.32 (-9.67, 4.80)  -2.54 (-9.71, 4.43)  22.5 (-2.93, 55.3)  1.75 (-15.5, 12.6)  -6.83 (-14.4, 9.94)  -1.34 (-17.1, 14.8) | 24.1 (3.82, 52.4)**  3.96 (-5.66, 11.4)  -2.84 (-10.2, 8.30)  3.02 (-5.37, 13.7)  31.9 (6.09, 75.4)*  3.02 (-9.50, 8.52)  -5.40 (-12.8, 15.1)  7.83 (-5.36, 21.5) |
| **Staging**  Localized  2004-2008  2008-2014  2014-2019  2019-2021  Regional  2004-2008  2008-2014  2014-2019  2019-2021  Distant  2004-2008  2008-2014  2014-2019  2019-2021 | 56.0 (47.5, 60.7)***  7.36 (5.42, 9.72)**  -2.26 (-5.78, 3.74)  5.40 (-0.74, 10.3)  38.8 (26.6, 42.0)***  3.74 (0.17, 6.92)*  -3.33 (-6.93, 6.39)  -2.17 (-8.45, 3.40)  17.0 (-95.7, 803.9)  -4.22 (-94).4, 1713.2)  -0.53 (-73.9, 721.4)  -2.89 (-8.45, 2.27) | 69.2 (47.1, 73.6)***  7.42 (5.70, 9.12)**  -2.75 (-6.60, 6.71)  5.57 (-1.12, 10.1)  42.6 (29.4, 45.5)***  5.48 (2.01, 8.63)**  -1.48 (-5.90, 9.10)  -3.31 (-9.93, 0.91)  8.05 (-86.1, 105.6)  -16.6 (-49.6, 280.7)  8.47 (5.82, 15.3)**  0.71 (-6.21, 3.01) | 33.9 (17.9, 84.9)***  5.24 (-3.17, 12.8)  -3.96 (-10.2, 11.2)  -0.69 (-12.0, 10.4)  30.5 (2.59, 68.4)*  2.41 (-15.5, 13.9)  -9.19 (-16.2, 12.7)  1.31 (-18.9, 21.8)  33.3 (2.18, 72.9)*  -8.00 (-16.3, 0.88)  1.44 (-1.03, 14.2)  -15.7 (-35.5, -3.82)** | 31.6 (-16.6, 225.4)  3.27 (-27.9, 47.2)  6.74 (-16.6, 50.1)  -6.12 (-39.2, 24.4)  32.4 (-13.5, 111.2)  2.25 (-21.7, 32.9)  10.6 (-20.6, 34.3)  -2.45 (-27.9, 28.5)  -19.3 (-58.2, 37.9)  16.4 (-35.6, 92.7)  -18.4 (-38.0, 44.1)  1.68 (-38.6, 53.1) | 42.2 (17.2, 75.2)***  6.38 (-4.98, 11.7)  1.43 (-9.34, 8.39)  -2.95 (-12.5, 5.22)  17.3 (-0.95, 43.0)  1.36 (-14.9, 9.49)  -9.69 (-15.7, 7.42)  -2.21 (-20.1, 13.4)  23.9 (-7.35, 70.9)  -4.31 (-19.0, 7.18)  -5.32 (-15.0, 9.60)  -0.84 (-17.0, 15.1) | 32.3 (7.18, 68.3)**  6.81 (-3.47, 13.5)  -1.89 (-9.95, 13.8)  9.47 (-2.20, 18.9)  21.1 (6.36, 67.8)*  -1.83 (-10.9, 5.28)  3.76 (-13.8, 13.3)  -3.18 (-20.1, 12.9)  19.9 (-2.17, 46.7)  -1.31 (-12.3, 7.14)  -5.92 (-12.4, 7.61)  2.14 (-7.89, 13.2) |
| **Race/Ethnicity**  Non-Hispanic White  2004-2008  2008-2014  2014-2019  2019-2021  Non-Hispanic Black  2004-2008  2008-2014  2014-2019  2019-2021  Non-Hispanic AI/AN  2004-2008  2008-2014  2014-2019  2019-2021  Non-Hispanic Asian/PI  2004-2008  2008-2014  2014-2019  2019-2021  Hispanic  2004-2008  2008-2014  2014-2019  2019-2021 | 39.9 (24.9, 56.7)***  5.64 (2.71, 7.44)***  -2.37 (-5.45, 8.44)  0.28 (-4.60, 3.67)  37.4 (13.1, 74.2)***  3.05 (-7.95, 8.50)  -4.95 (-12.1, 11.6)  -0.98 (-14.5, 12.2)  12.6 (-16.4, 65.4)  8.32 (-12.5, 30.8)  3.07 (-10.3, 22.1)  -3.83 (-23.5, 12.3)  31.5 (10.0, 41.9)***  0.89 (-2.54, 4.74)  -5.13 (-8.56, 1.67)  -2.28 (-5.92, 4.16)  29.7 (13.9, 47.8)***  3.28 (-1.82, 6.10)  -2.30 (-7.93, 7.21)  5.27 (-1.89, 12.5) | N/A | N/A | N/A | N/A | N/A |
|  |  |  |  |  |  |  |

Log-normal Regression via Joinpoint. *p<0.05 **p<0.01 ***p<0.001
